# Supplementary material
Source: PubMed Central journal article supplement (PMC4258153)

# Sup Figure 1B

Expression at 55th-percentile or lower: Low risk  
Expression at 80th-percentile or higher: High risk

### SHMT2 expression by group

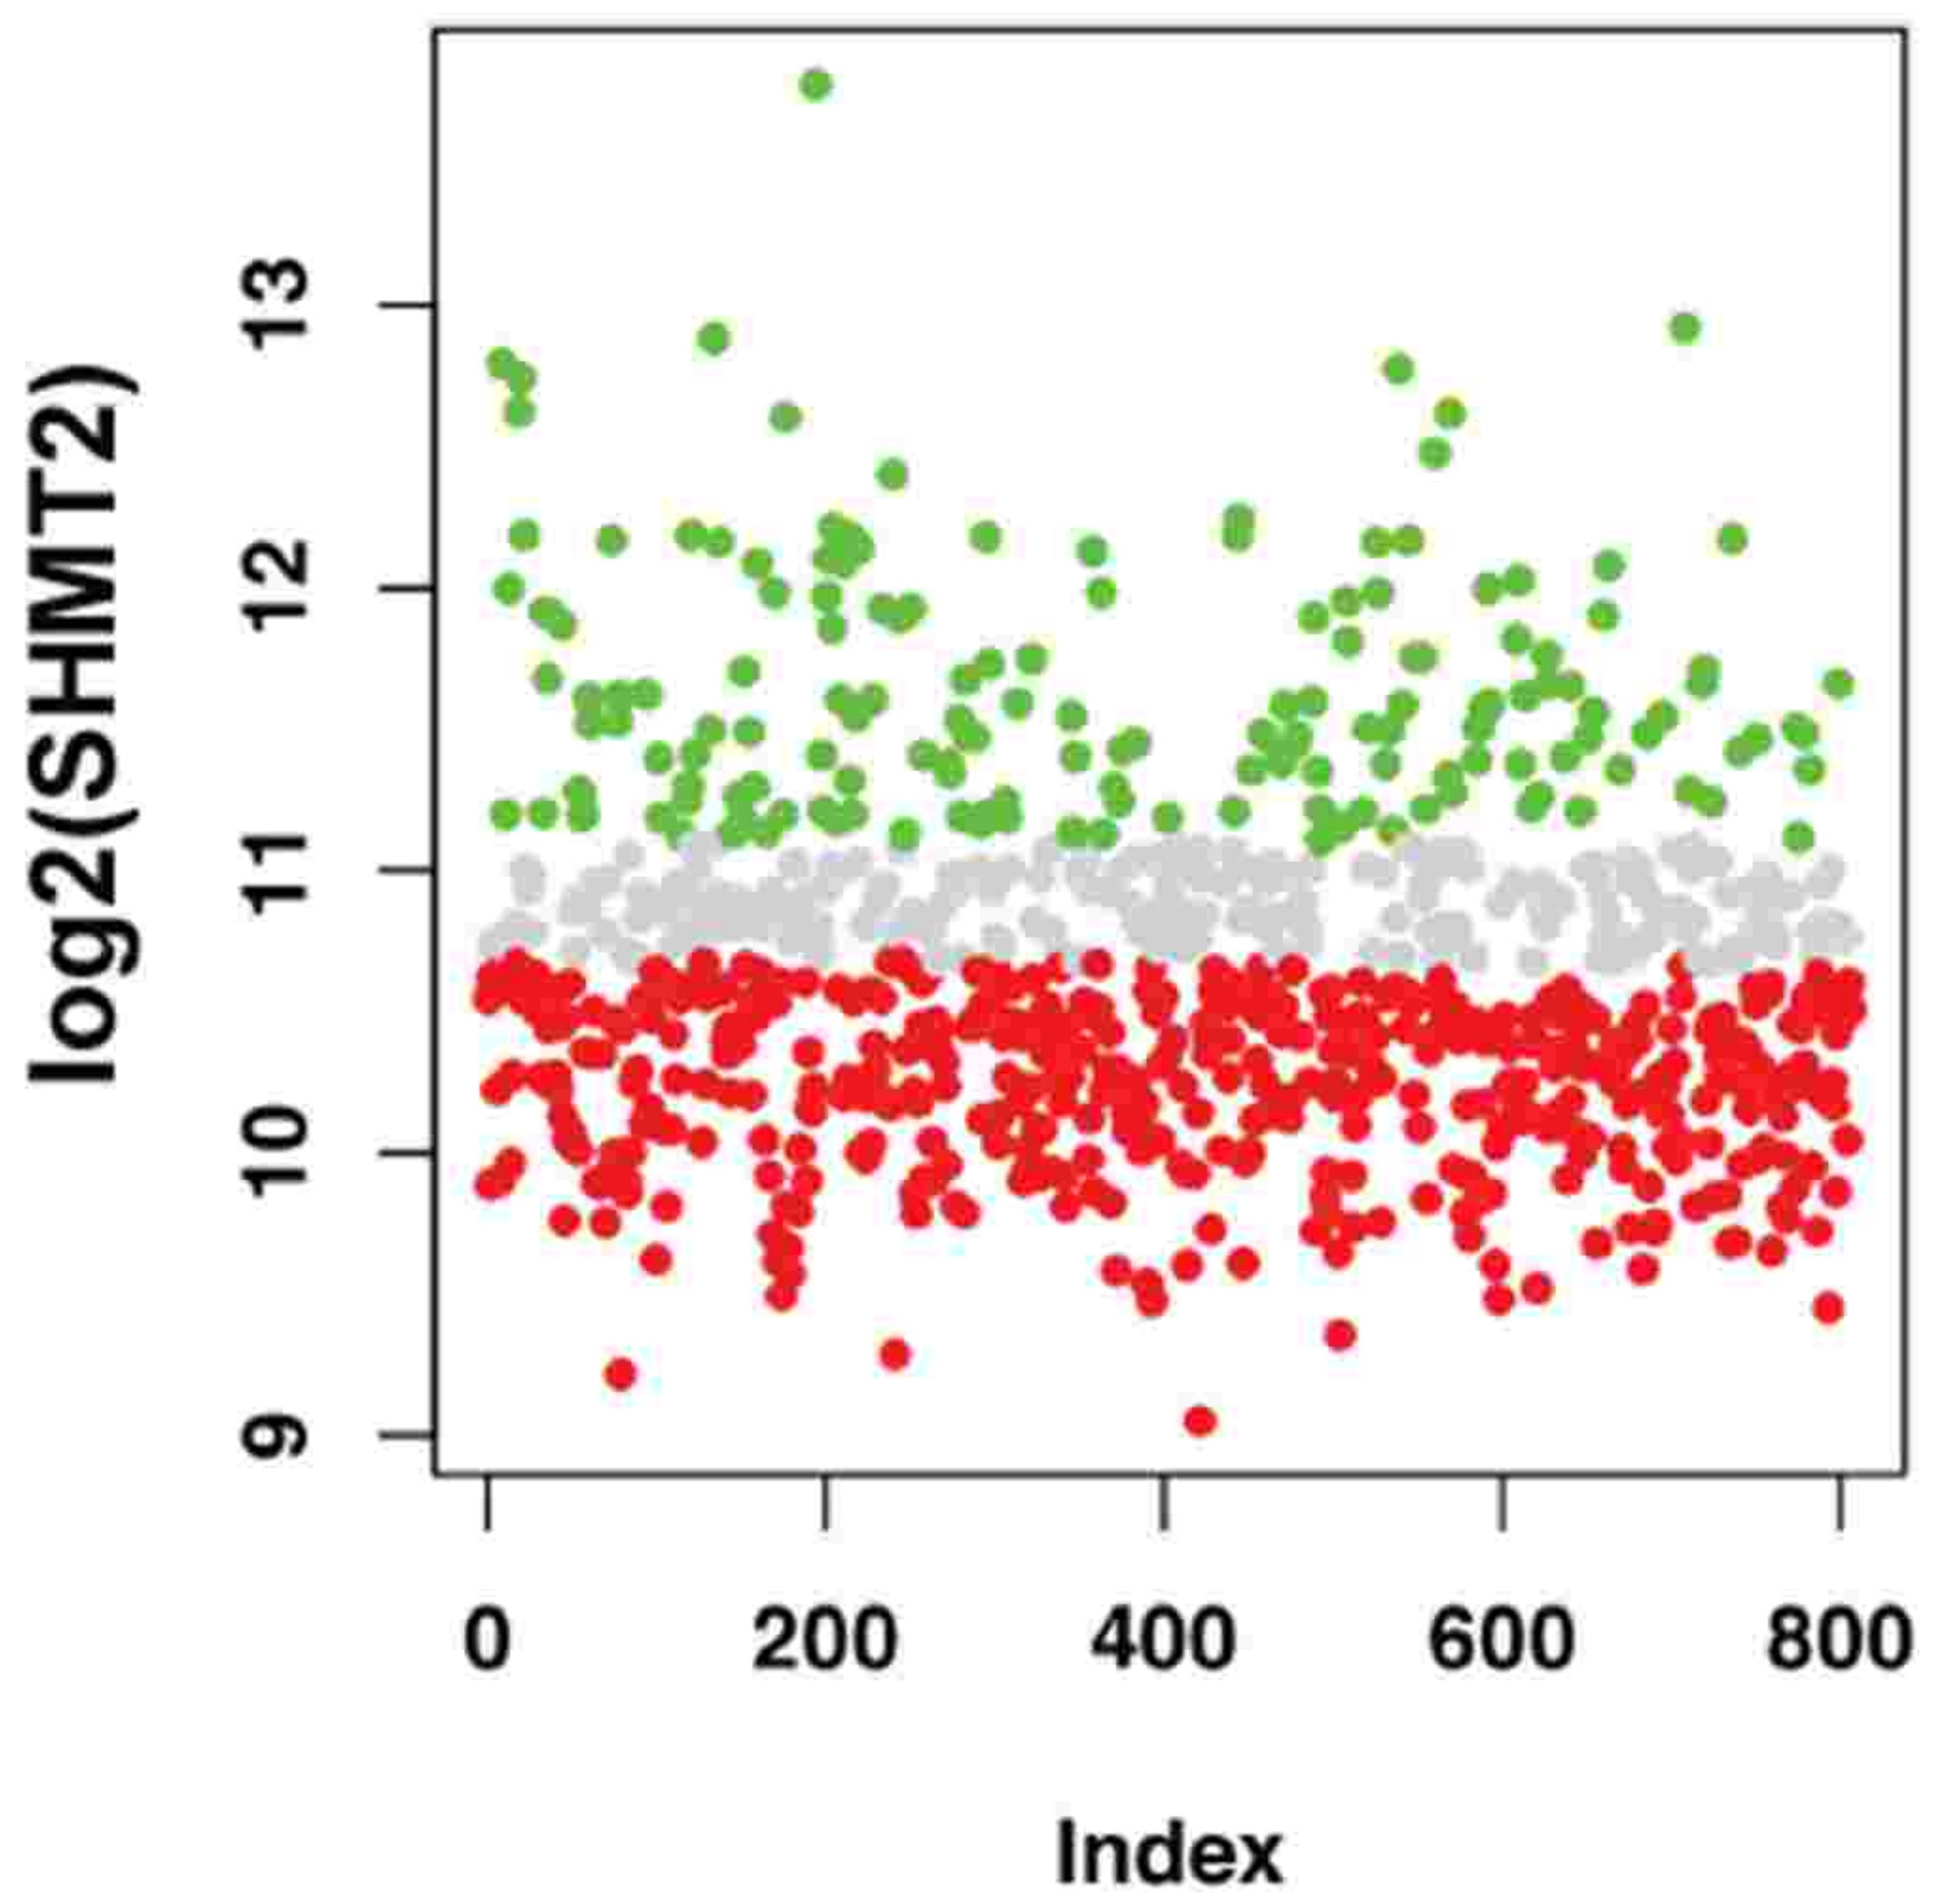

### Kaplan-Meier Survival Analysis

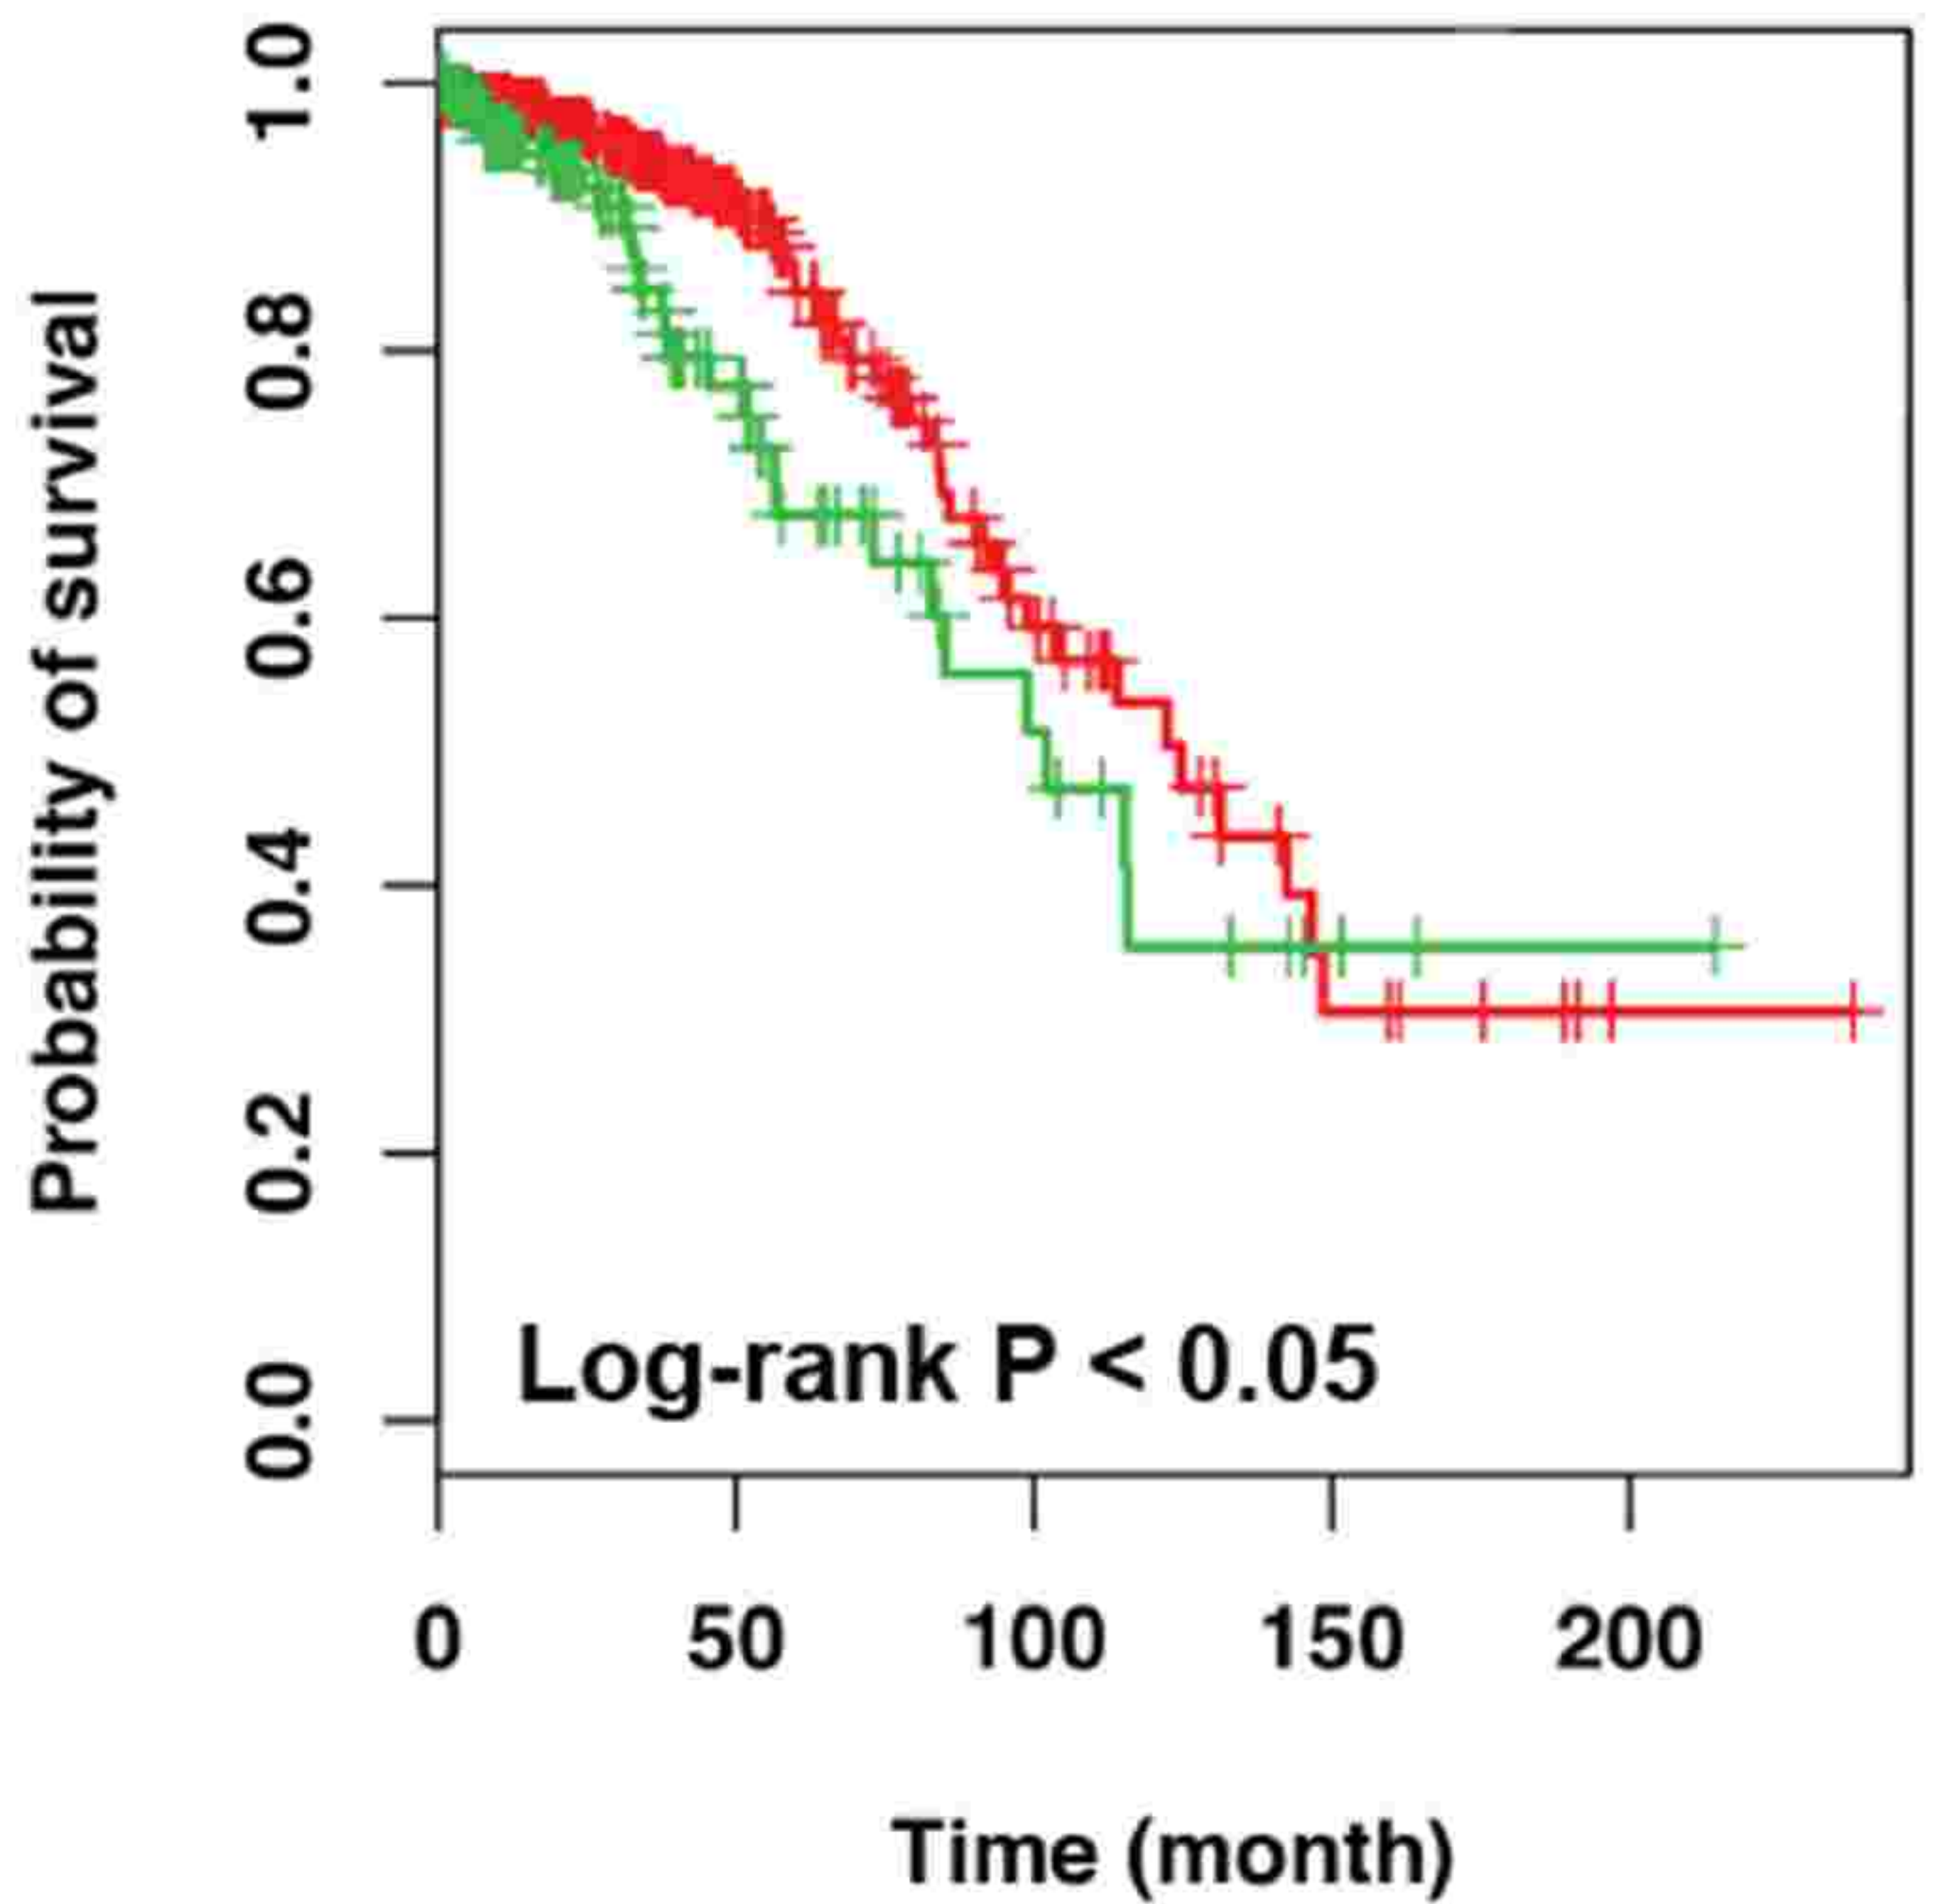

Supplement: NIHMS625831-supplement-2.pdf [file NIHMS625831-supplement-2.pdf]
