# Supplementary material
Source: PubMed Central journal article supplement (PMC4258153)
Supplement: NIHMS625831-supplement-7.pdf [file NIHMS625831-supplement-7.pdf]

## Sup Table 1

| Group   | Tumor formed/ injected | volume mean (mm <sup>3</sup> ) | weight mean(g) |
|---------|------------------------|--------------------------------|----------------|
| shNT    | 8/10                   | 3488.37                        | 1.046          |
| shSHMT2 | 6/10                   | 1674.24                        | 0.460          |
