# Supplementary material
Source: PubMed Central journal article supplement (PMC4258153)

# Sup Figure 1A

## Died

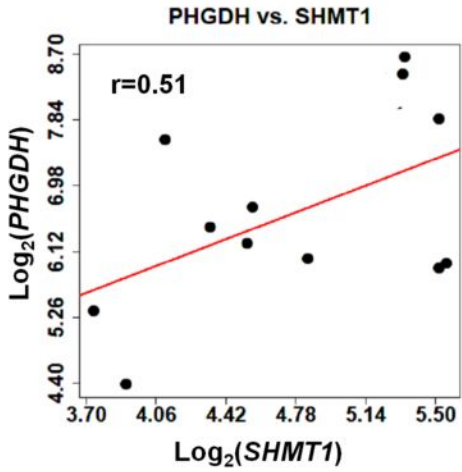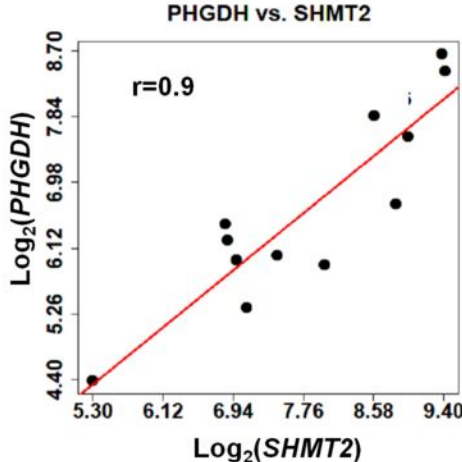

## Alive

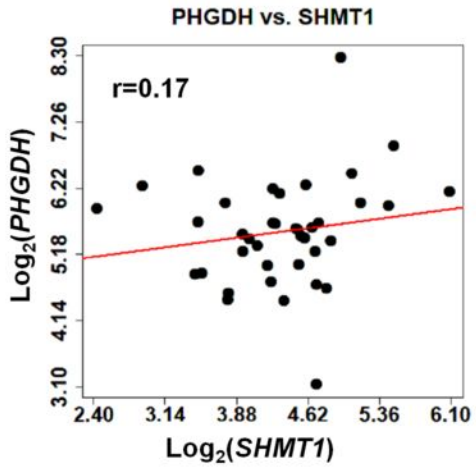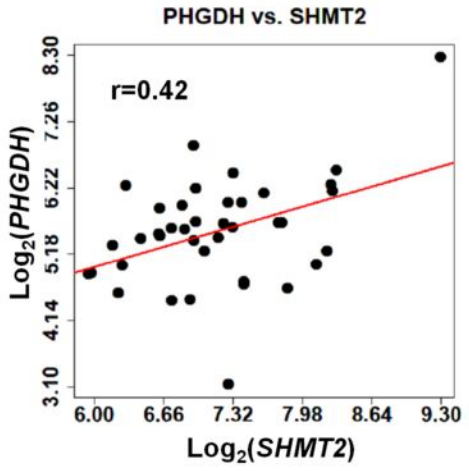

Supplement: NIHMS625831-supplement-1.pdf [file NIHMS625831-supplement-1.pdf]

# Sup Figure 2

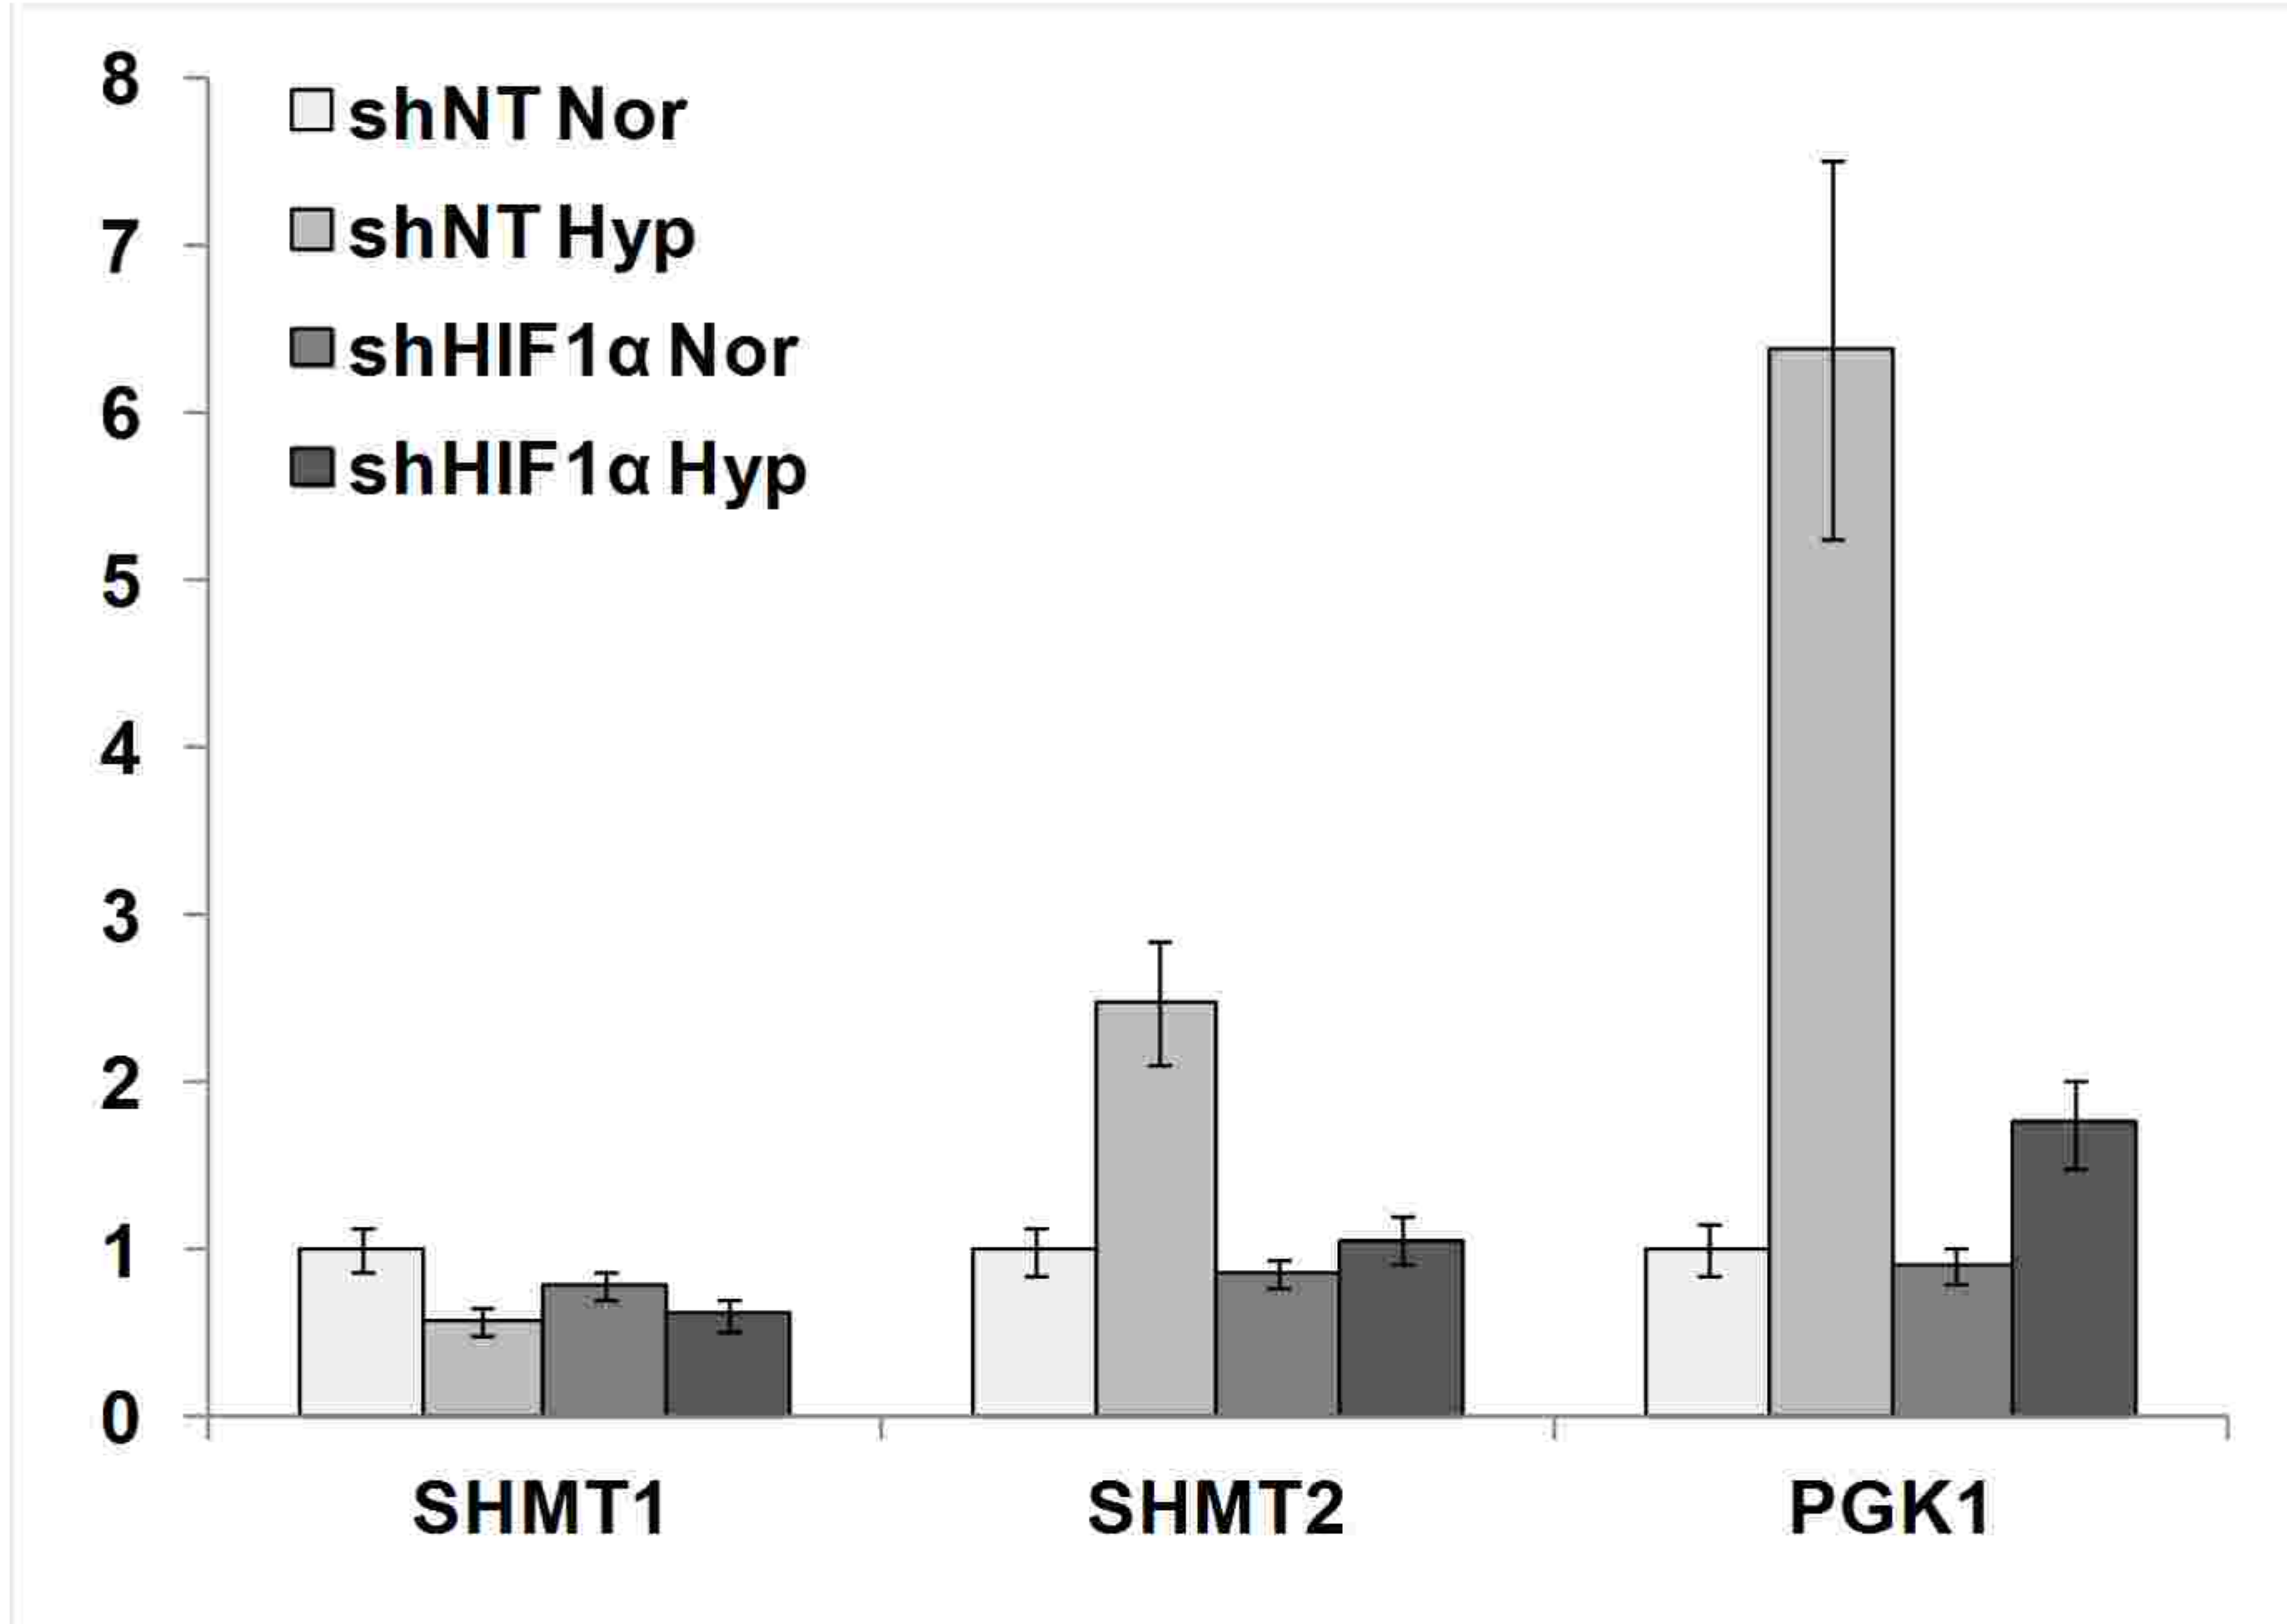

Supplement: NIHMS625831-supplement-3.pdf [file NIHMS625831-supplement-3.pdf]

**Sup Figure 3**

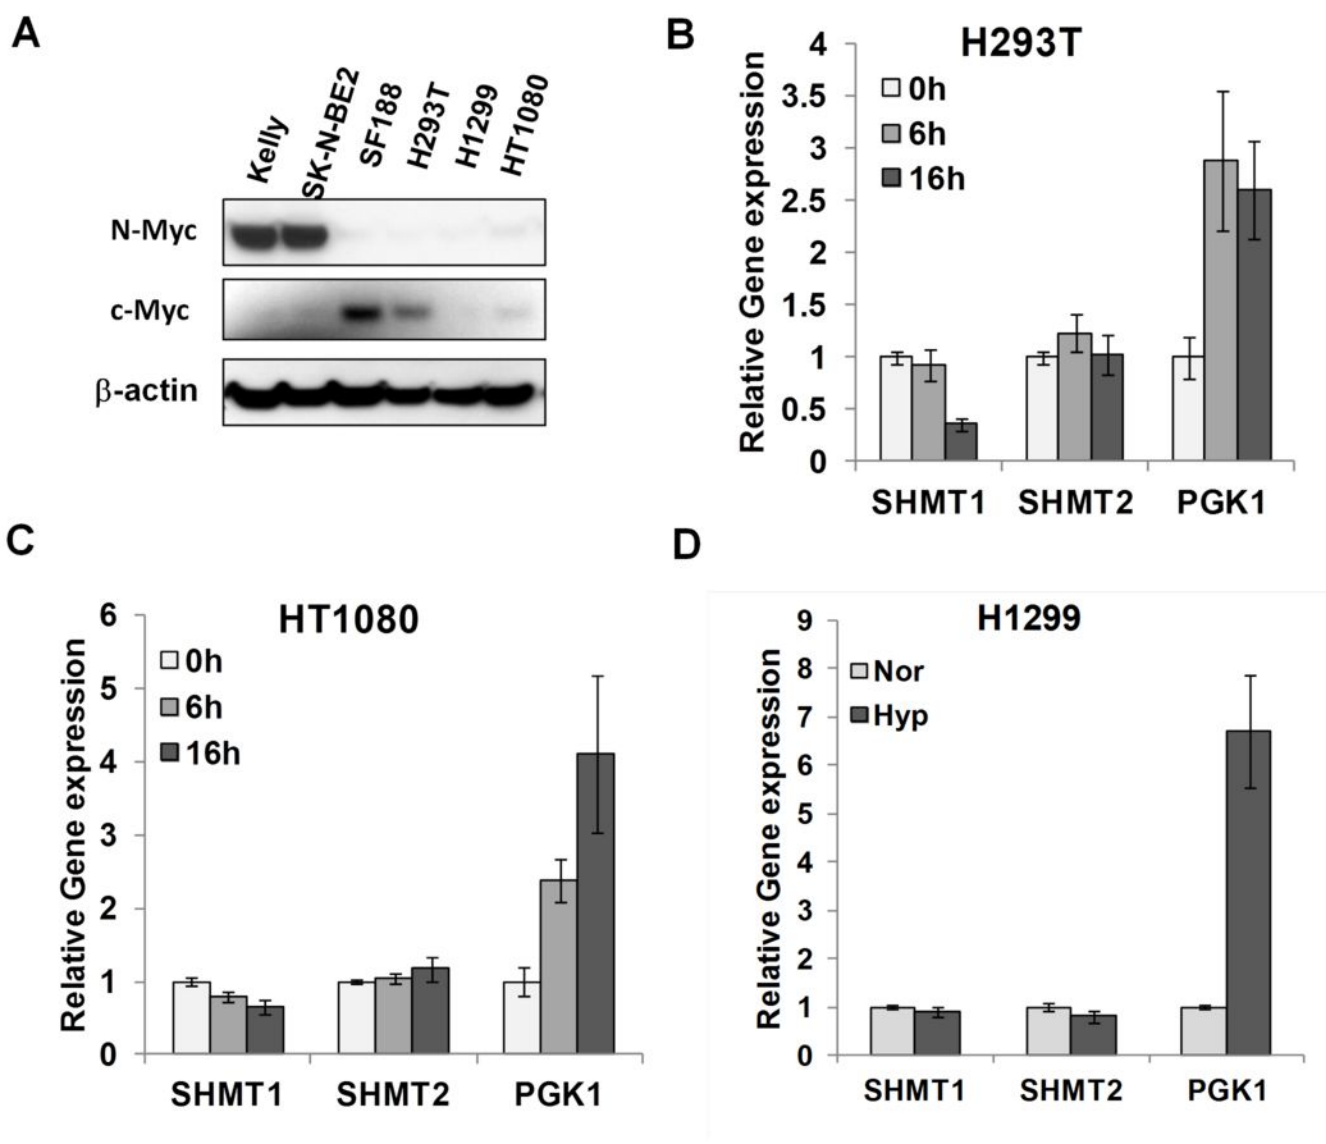

Supplement: NIHMS625831-supplement-4.pdf [file NIHMS625831-supplement-4.pdf]

Sup Figure 4

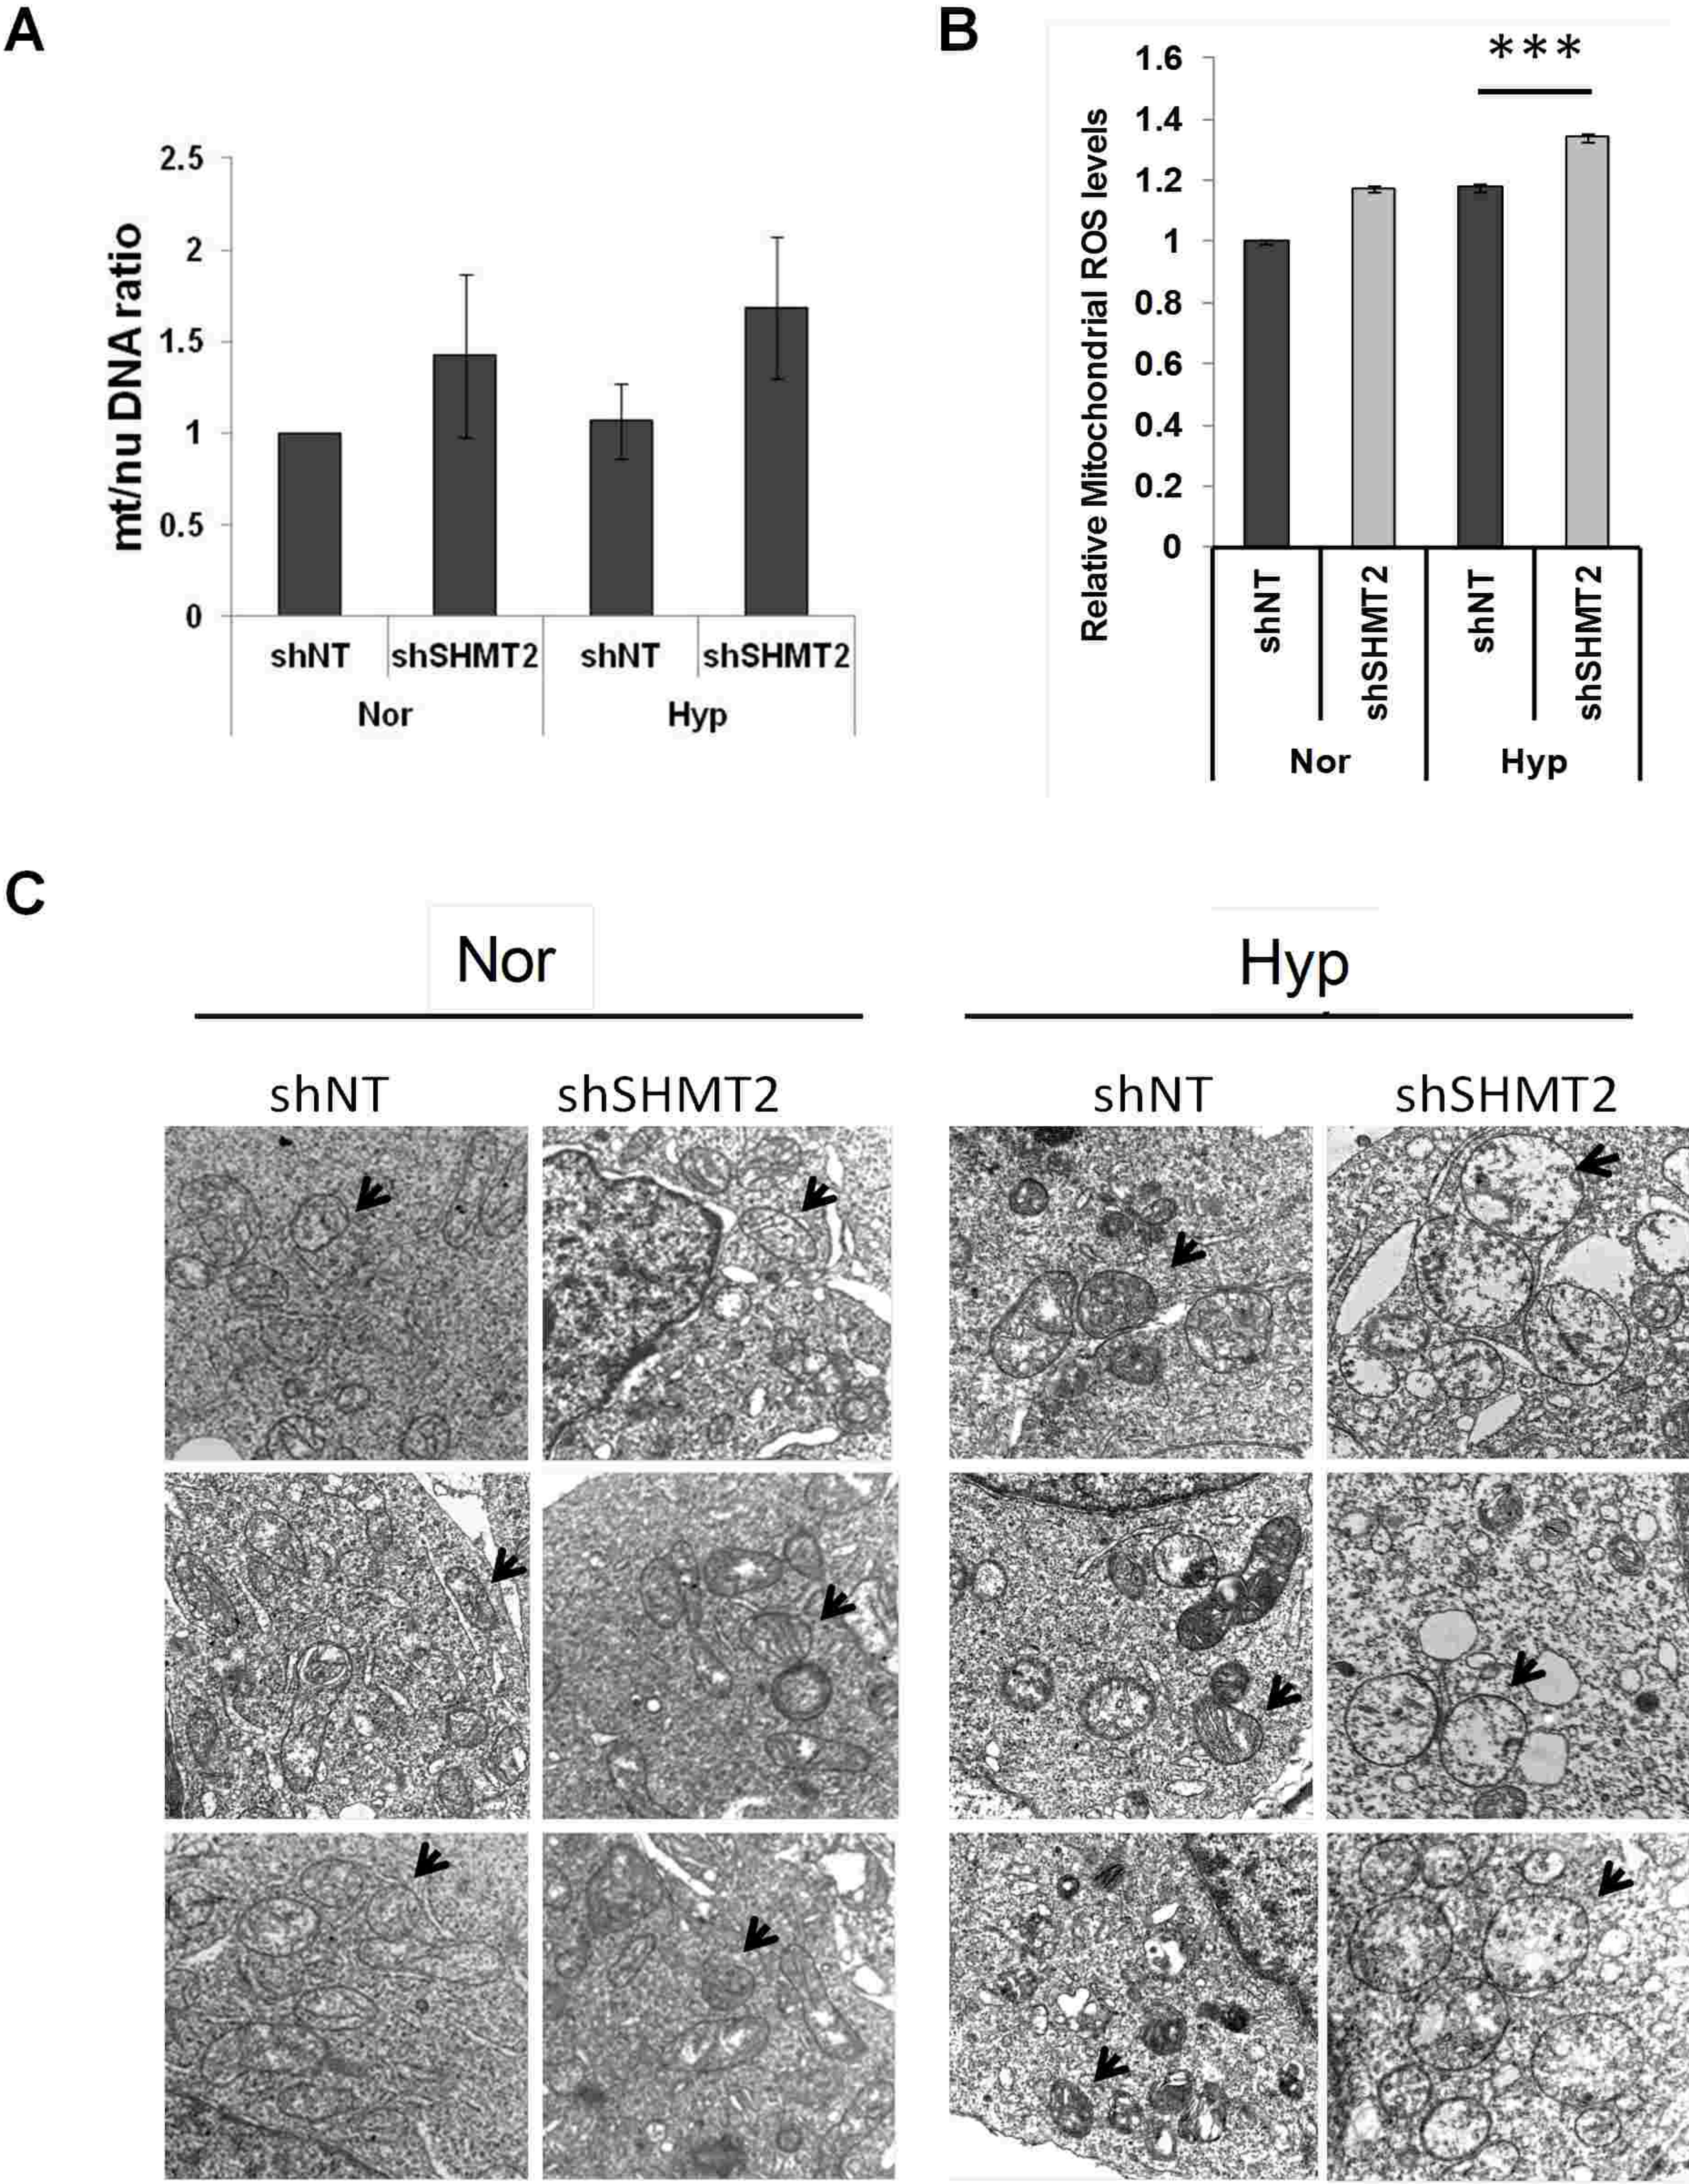

Supplement: NIHMS625831-supplement-5.pdf [file NIHMS625831-supplement-5.pdf]

Sup Figure 5

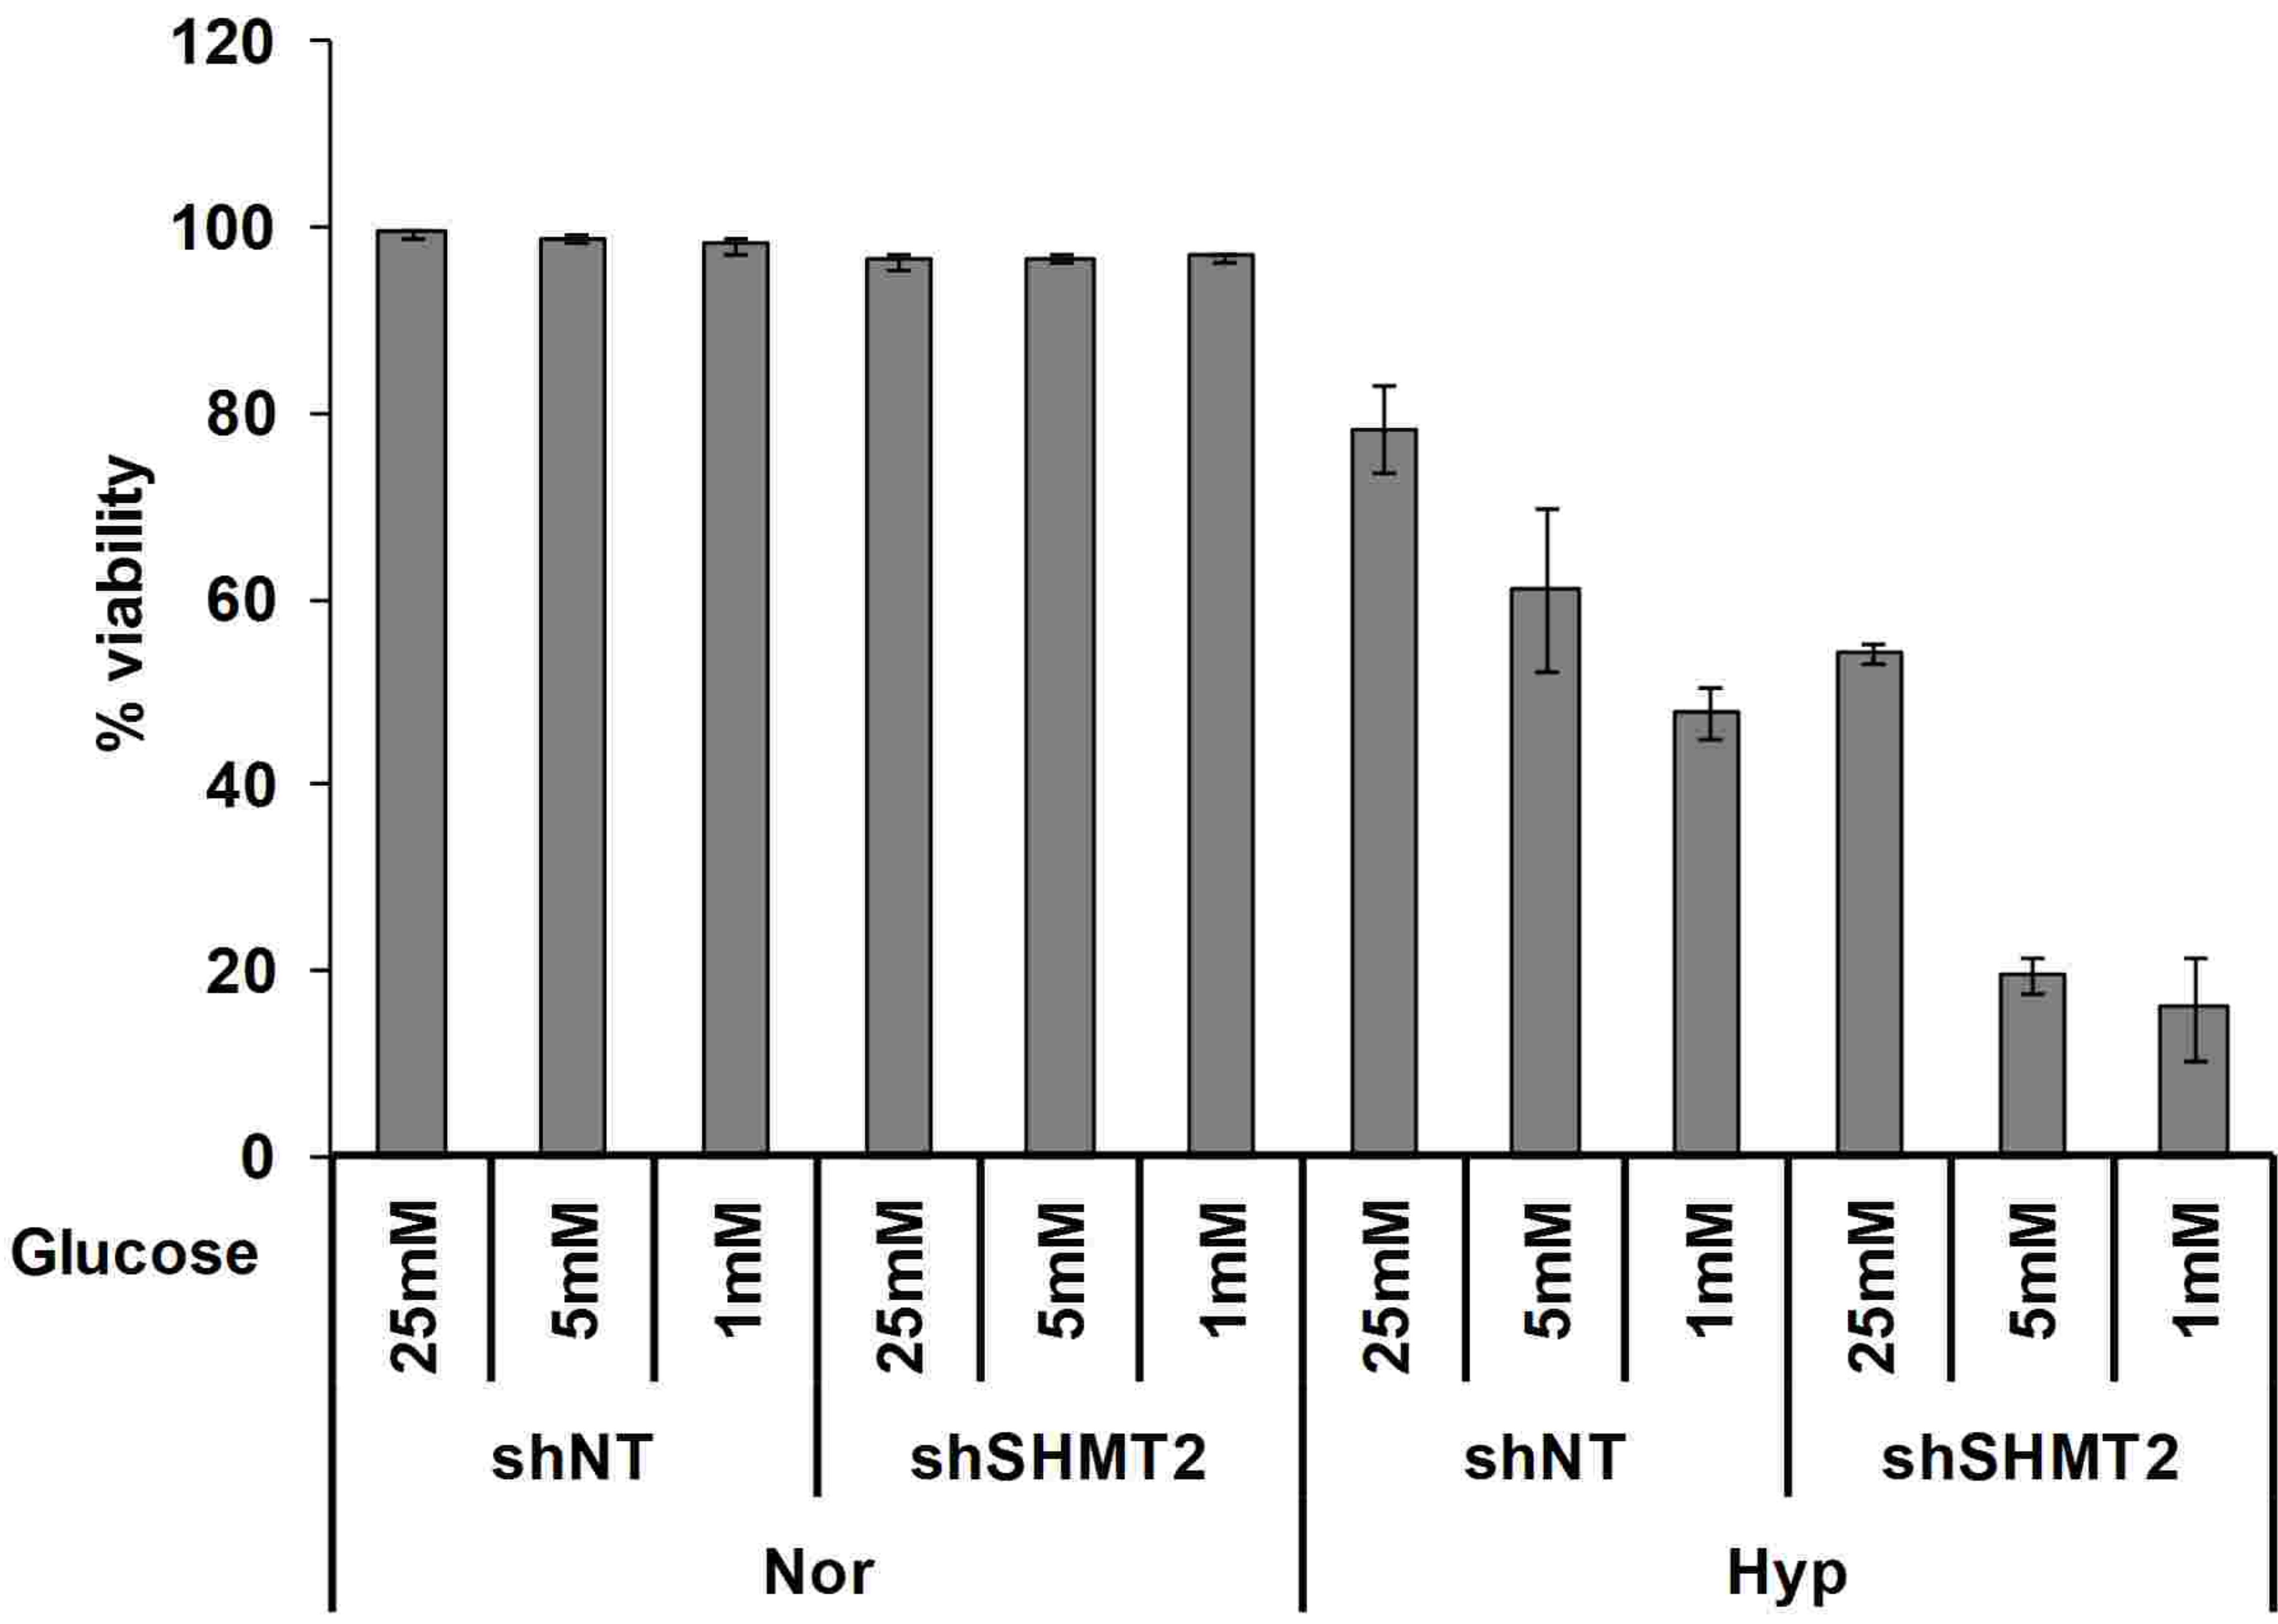

Supplement: NIHMS625831-supplement-6.pdf [file NIHMS625831-supplement-6.pdf]
